# Supplementary material
Source: PubMed Central journal article supplement (PMC3376223)
Supplement: NIHMS370863-supplement-1_si_001.pdf [file NIHMS370863-supplement-1_si_001.pdf]

*Supporting Information for*

# Targeting native adult heart progenitors with cardiogenic small-molecules

---

Jamie L. Russell<sup>1</sup>, Sean C. Goetsch<sup>1</sup>, Hector Aguilar<sup>2</sup>, Doug E. Frantz<sup>2</sup>, Jay W. Schneider<sup>1\*</sup>

<sup>1</sup>Department of Internal Medicine, University of Texas Southwestern Medical Center, Dallas,  
Texas, USA

<sup>2</sup>Department of Chemistry, University of Texas at San Antonio, San Antonio, Texas, USA

\*e-mail: [jay.schneider@utsouthwestern.edu](mailto:jay.schneider@utsouthwestern.edu)

Supplemental Figure 1

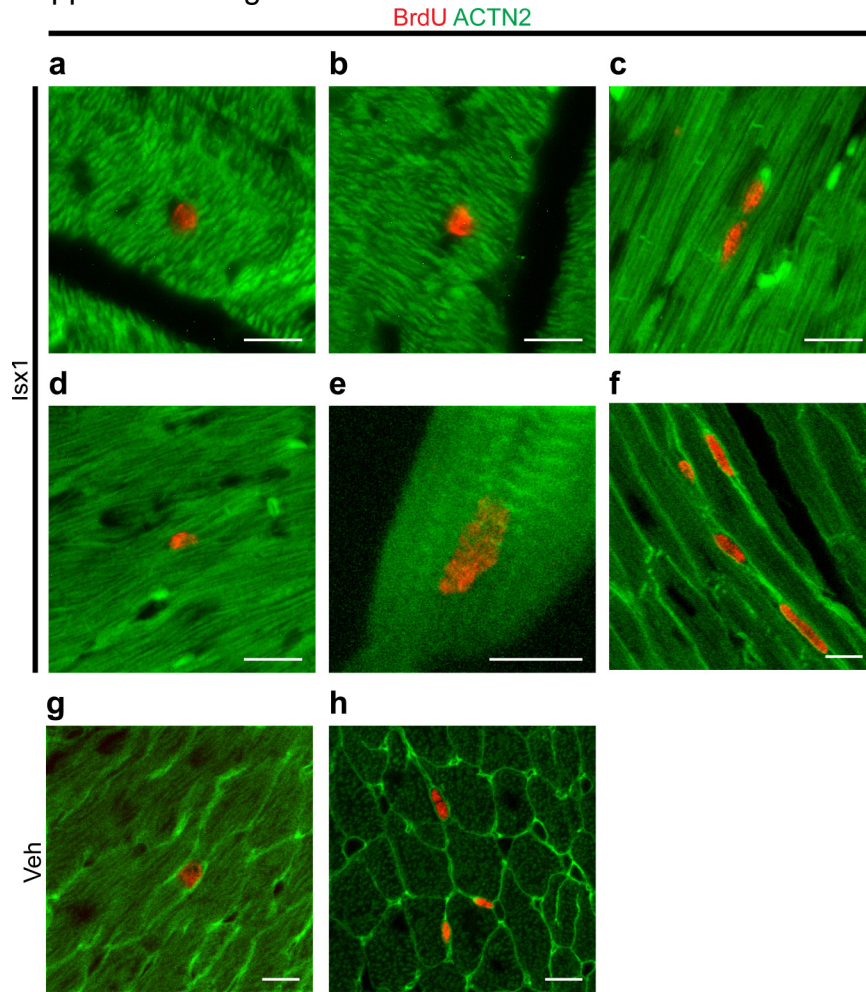

**Supplemental Figure 1. Isx1 activates DNA synthesis in myocardial cells, including cardiomyocytes, *in vivo*.** BrdU immunohistochemistry (red) in uninjured adult mouse heart injected with Isx (a-e) or vehicle (f and g) co-stained with ACTN2 (green) and DAPI (blue) (Scale bars = 10µm). Probable BrdU+ cardiomyocytes are depicted in images a-e and g and non-cardiomyocytes in images f and h.

Supplemental Figure 2

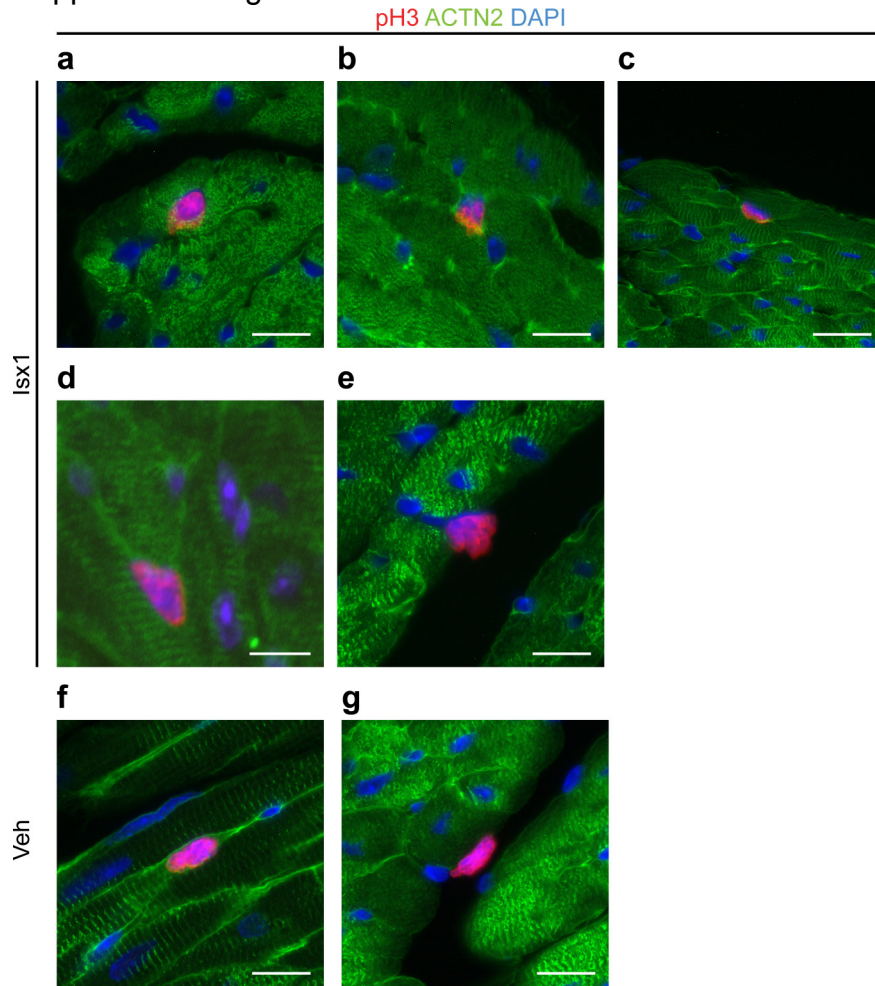

**Supplemental Figure 2. Isx1 increases phosphohistone H3 positive myocardial cell, including cardiomyocyte, number *in vivo*.** Phospho-histone H3 immunohistochemistry (red) in uninjured adult mouse heart injected with Isx (**a-e**) or vehicle (**f** and **g**) co-stained with ACTN2 (green) and DAPI (blue) (Scale bars = 10 $\mu$ m). A probable phospho-histone H3+ cardiomyocyte is depicted in image (**a**) and several other positive non-cardiomyocytes in images **b-g**.

Supplemental Figure 3

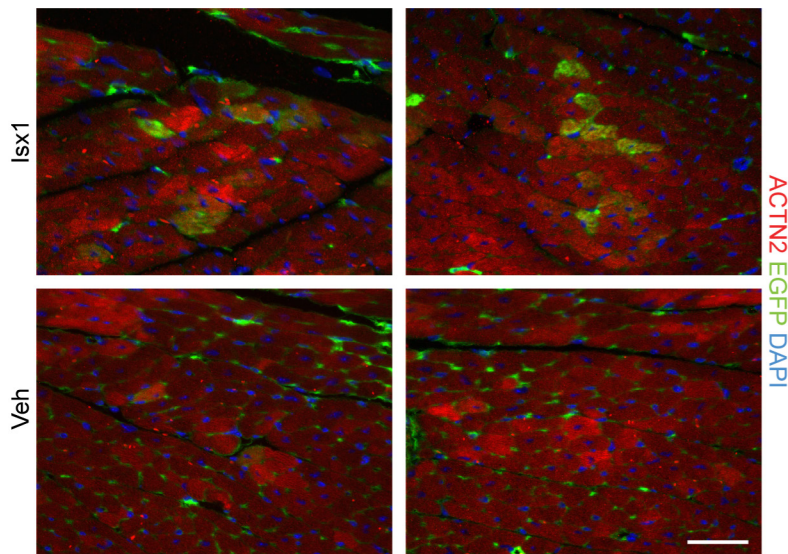

**Supplemental Figure 3. Isx1 increases Notch-CBF1-RE<sub>x4</sub>-EGFP myocardial cell, including cardiomyocyte, number *in vivo*.** EGFP (red) immunohistochemistry localized to TNNI3 (green) cardiomyocytes, co-stained with DAPI (blue) in uninjured adult mouse heart injected with Isx (upper panels) or vehicle (lower panels) (Scale bars = 10 $\mu$ m).
